# Supplementary figures and images for: Revealing the role of interfacial heterogeneous nucleation in the metastable thin film growth of rare-earth nickelate electronic transition materials
Source: Royal Society of Chemistry journal article supplement (doi:10.1039/d1cp05347g), 2022-01-01

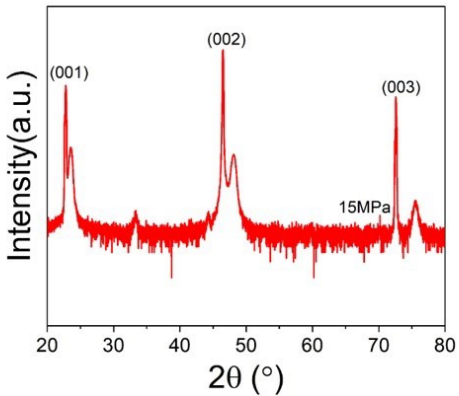

Supplement: d1cp05347g2.pdf [file d1cp05347g2.pdf]

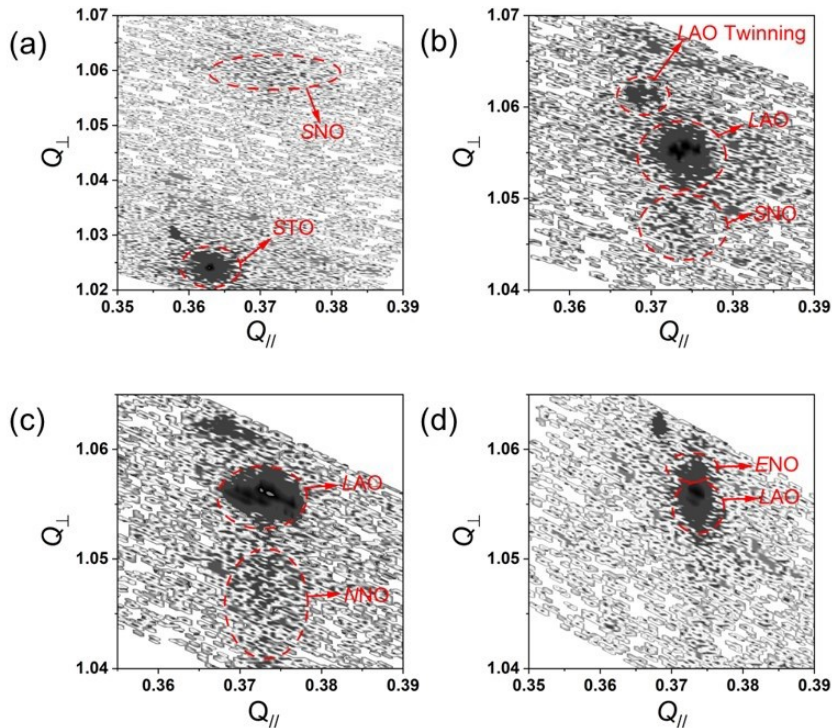

Supplement: d1cp05347g3.pdf [file d1cp05347g3.pdf]

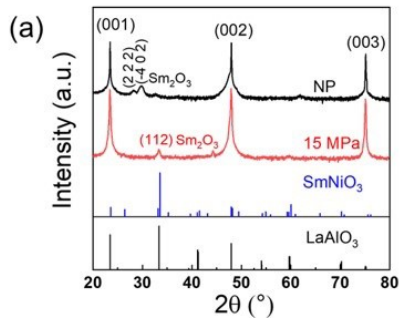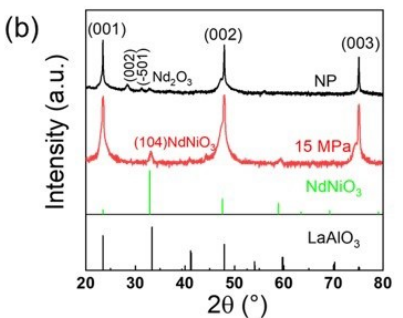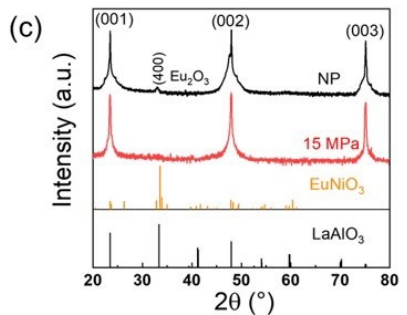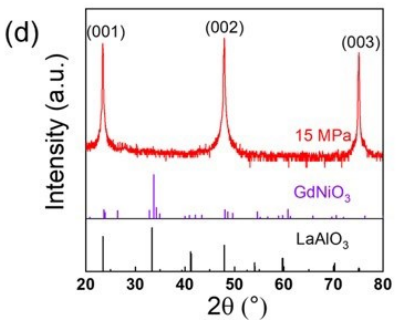

Supplement: d1cp05347g4.pdf [file d1cp05347g4.pdf]

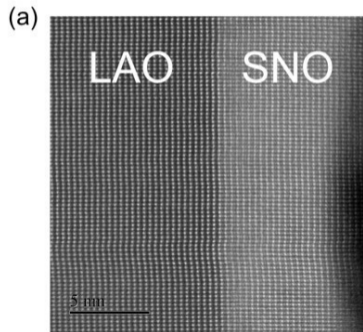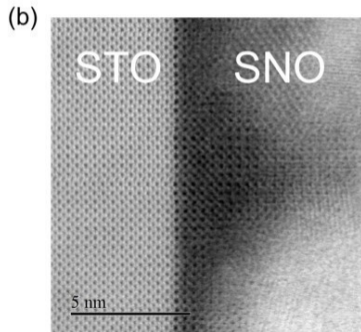

Supplement: d1cp05347g5.pdf [file d1cp05347g5.pdf]

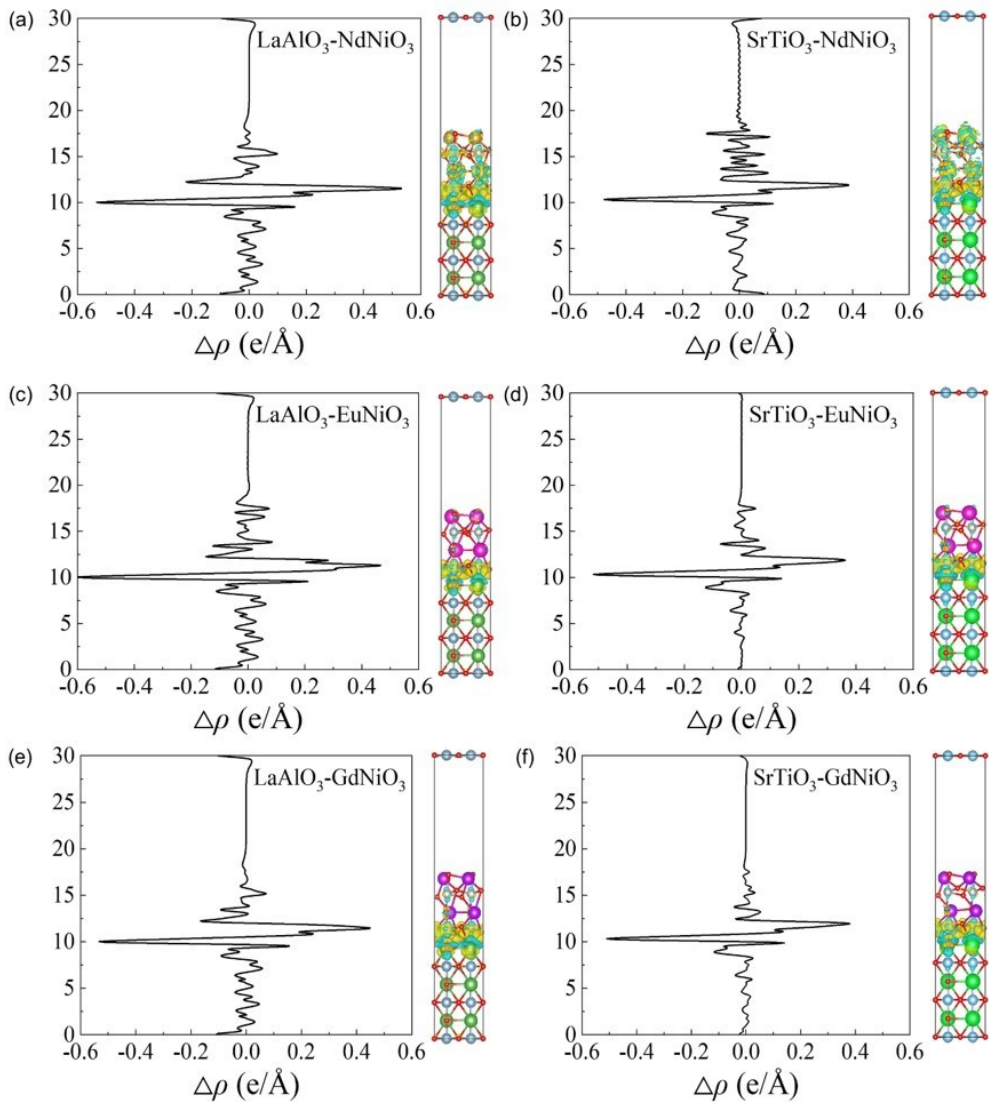

Supplement: d1cp05347g6.pdf [file d1cp05347g6.pdf]

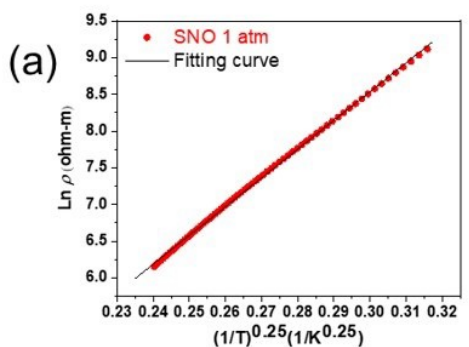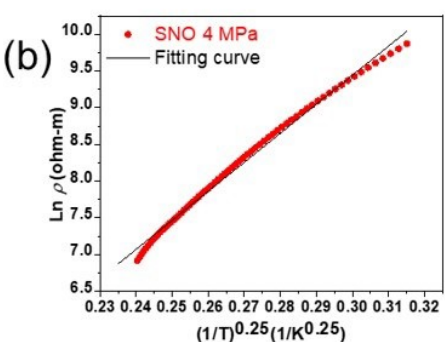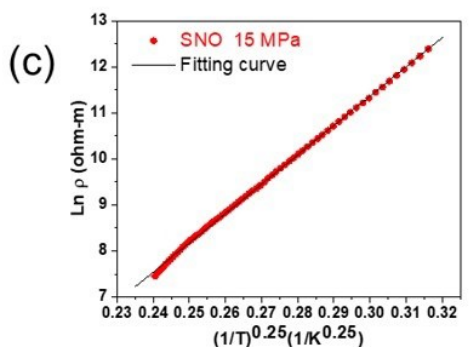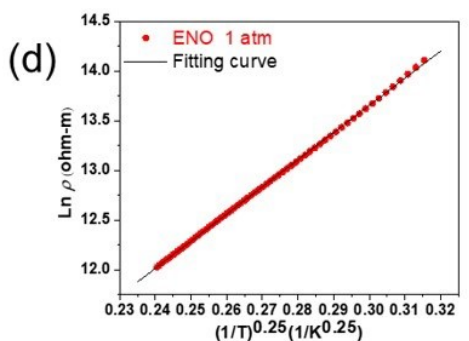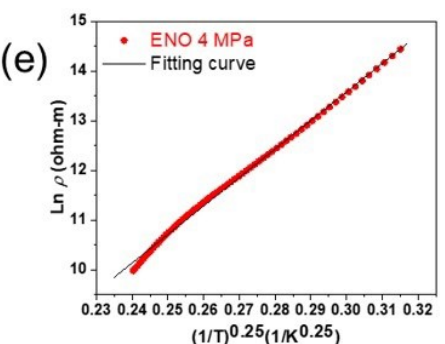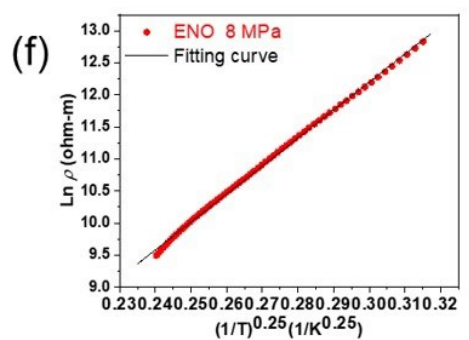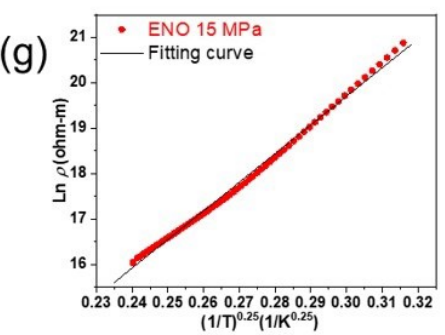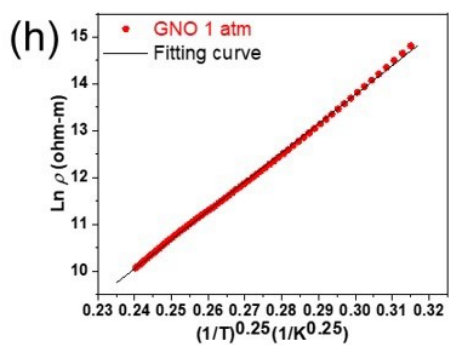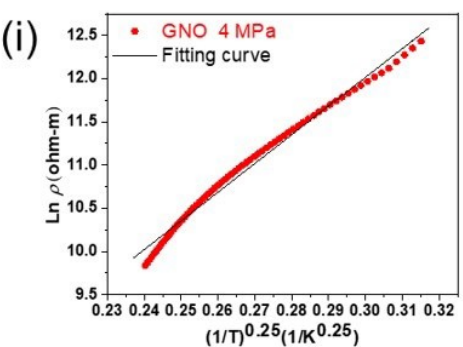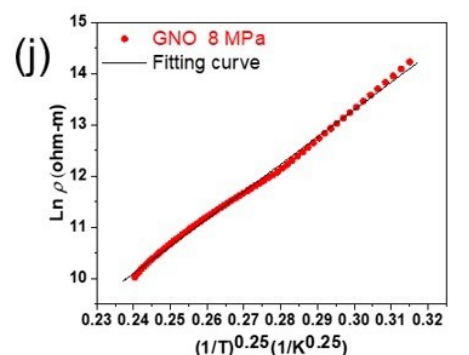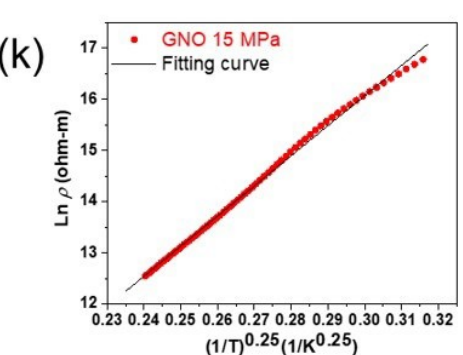

Supplement: d1cp05347g7.pdf [file d1cp05347g7.pdf]

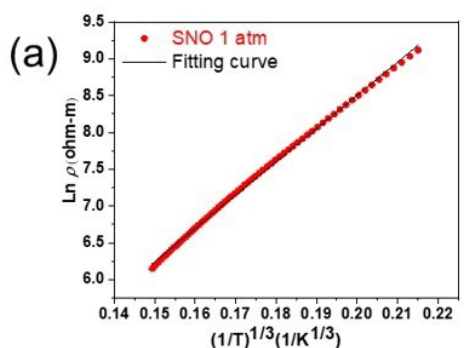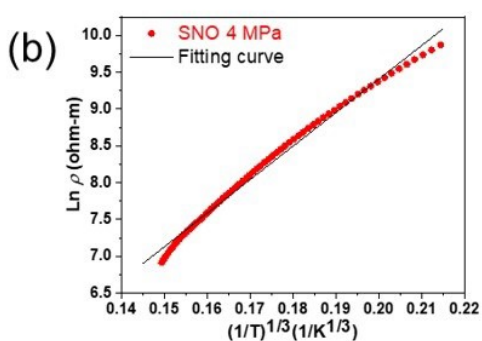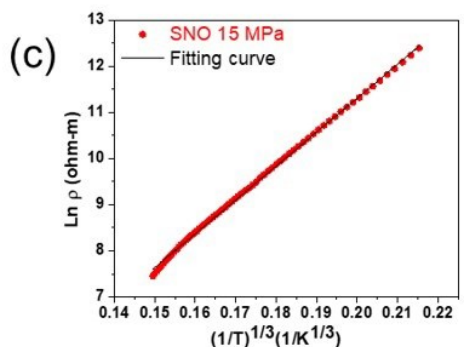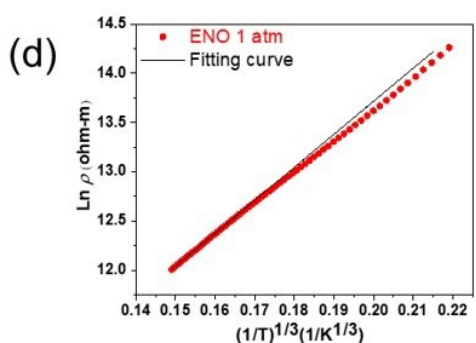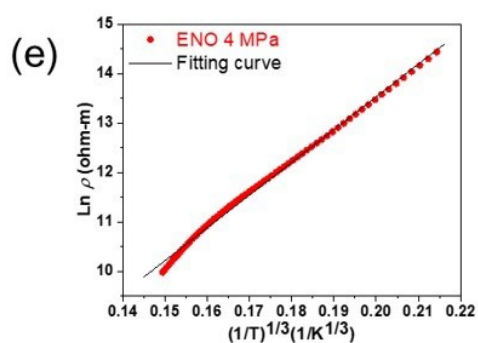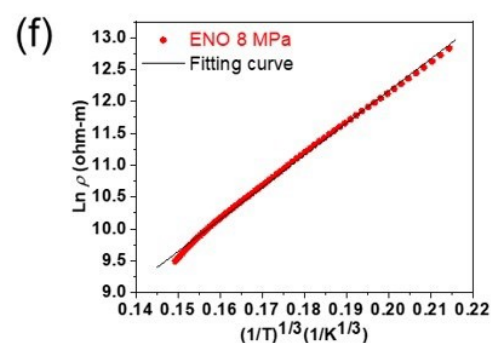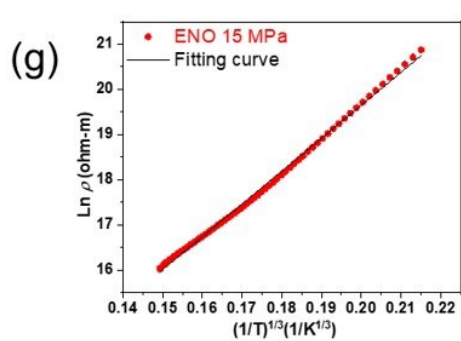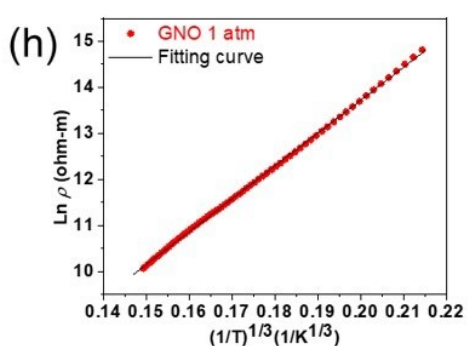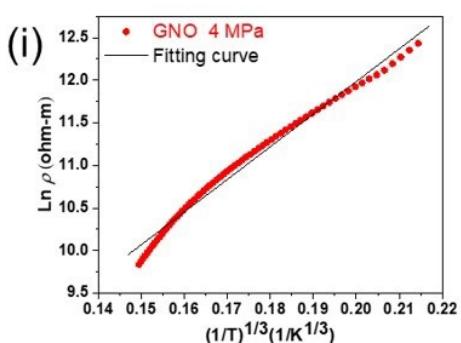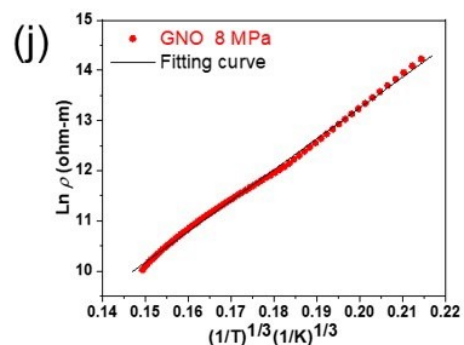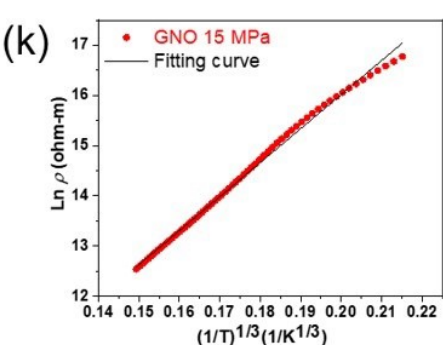

Supplement: d1cp05347g8.pdf [file d1cp05347g8.pdf]

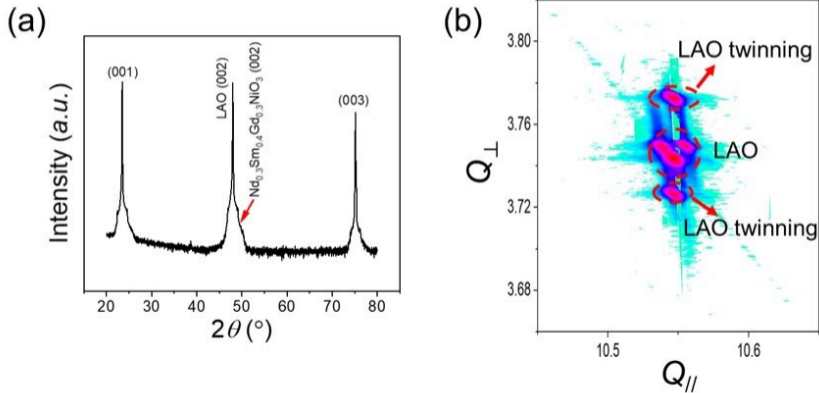

Supplement: d1cp05347g9.pdf [file d1cp05347g9.pdf]
